# Supplementary material
Source: PubMed Central journal article supplement (PMC3802533)
Supplement: NIHMS516212-supplement-01.pdf [file NIHMS516212-supplement-01.pdf]

Type of file: figure

Label: Figure 1

Filename: IJC\_27690\_sm\_SuppFigS1.tif

U87 cells  
 $\Delta$ EGFR levels

medium  
high  
superhigh

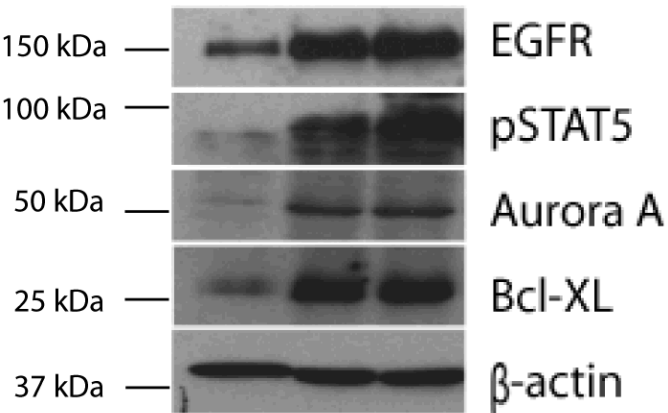

Type of file: figure

Label: Figure 2

Filename: IJC\_27690\_sm\_SuppFigS2.tif

A

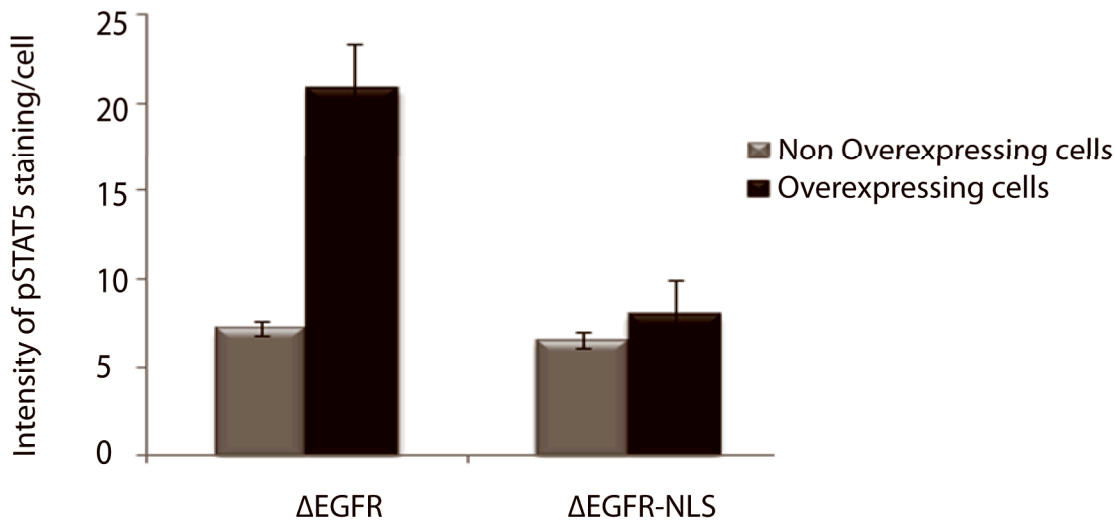

B

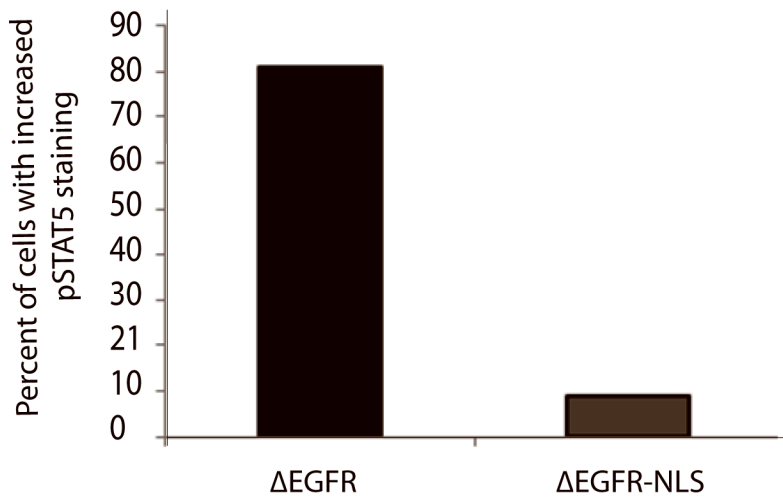

Type of file: figure

Label: Figure 3

Filename: IJC\_27690\_sm\_SuppFigS3.tif

**LNZ308**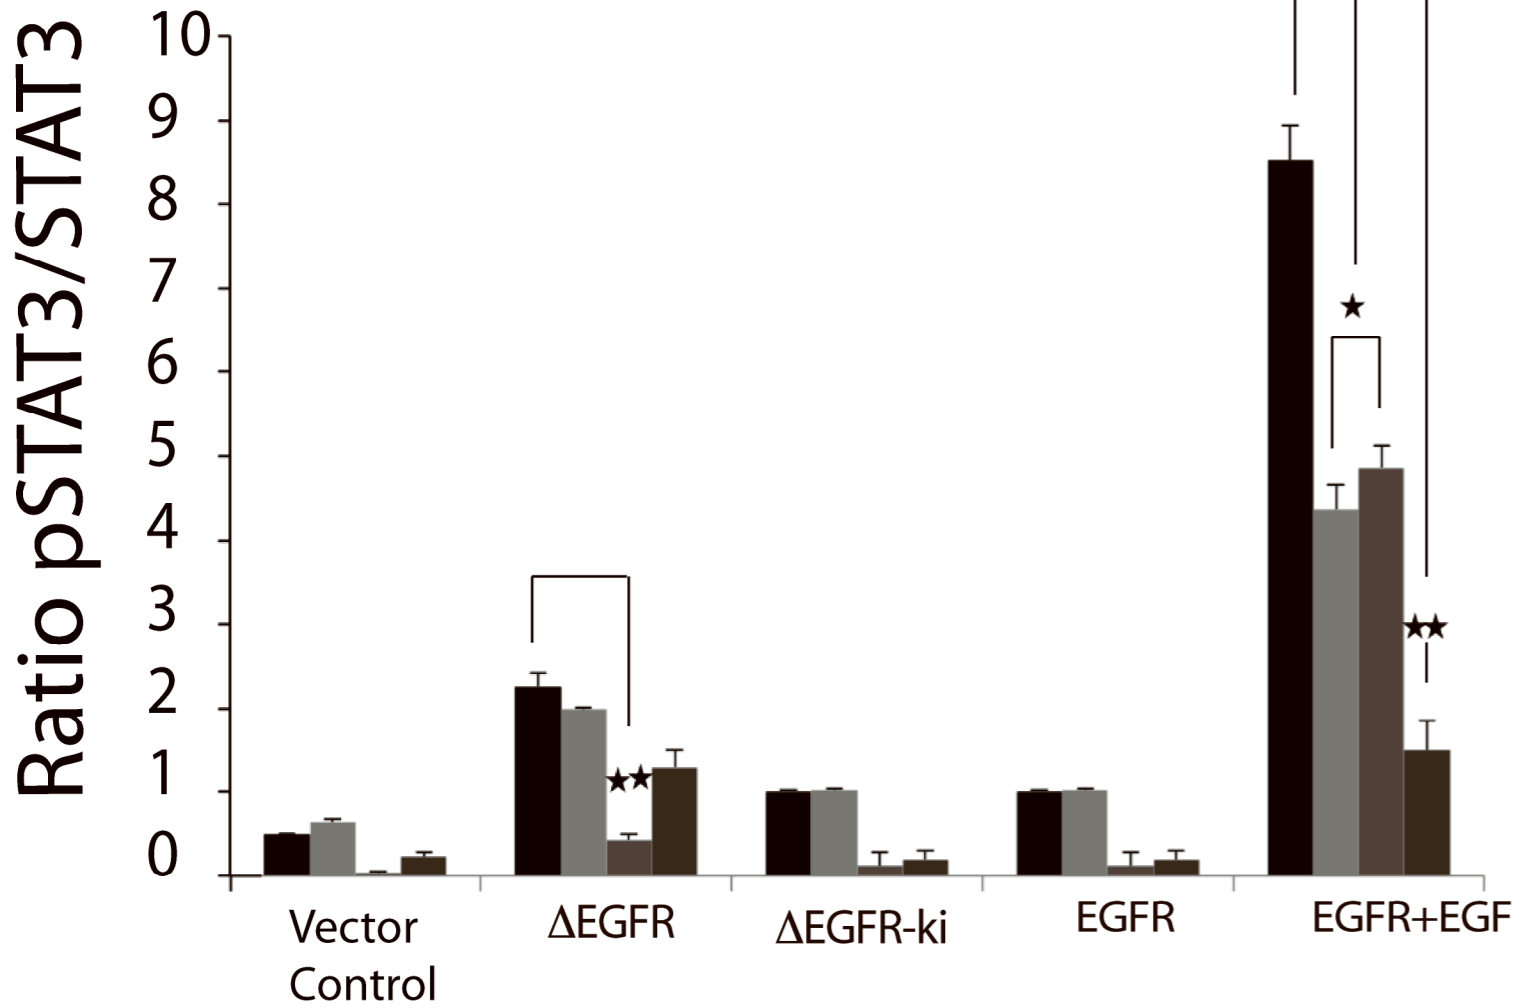**LN428**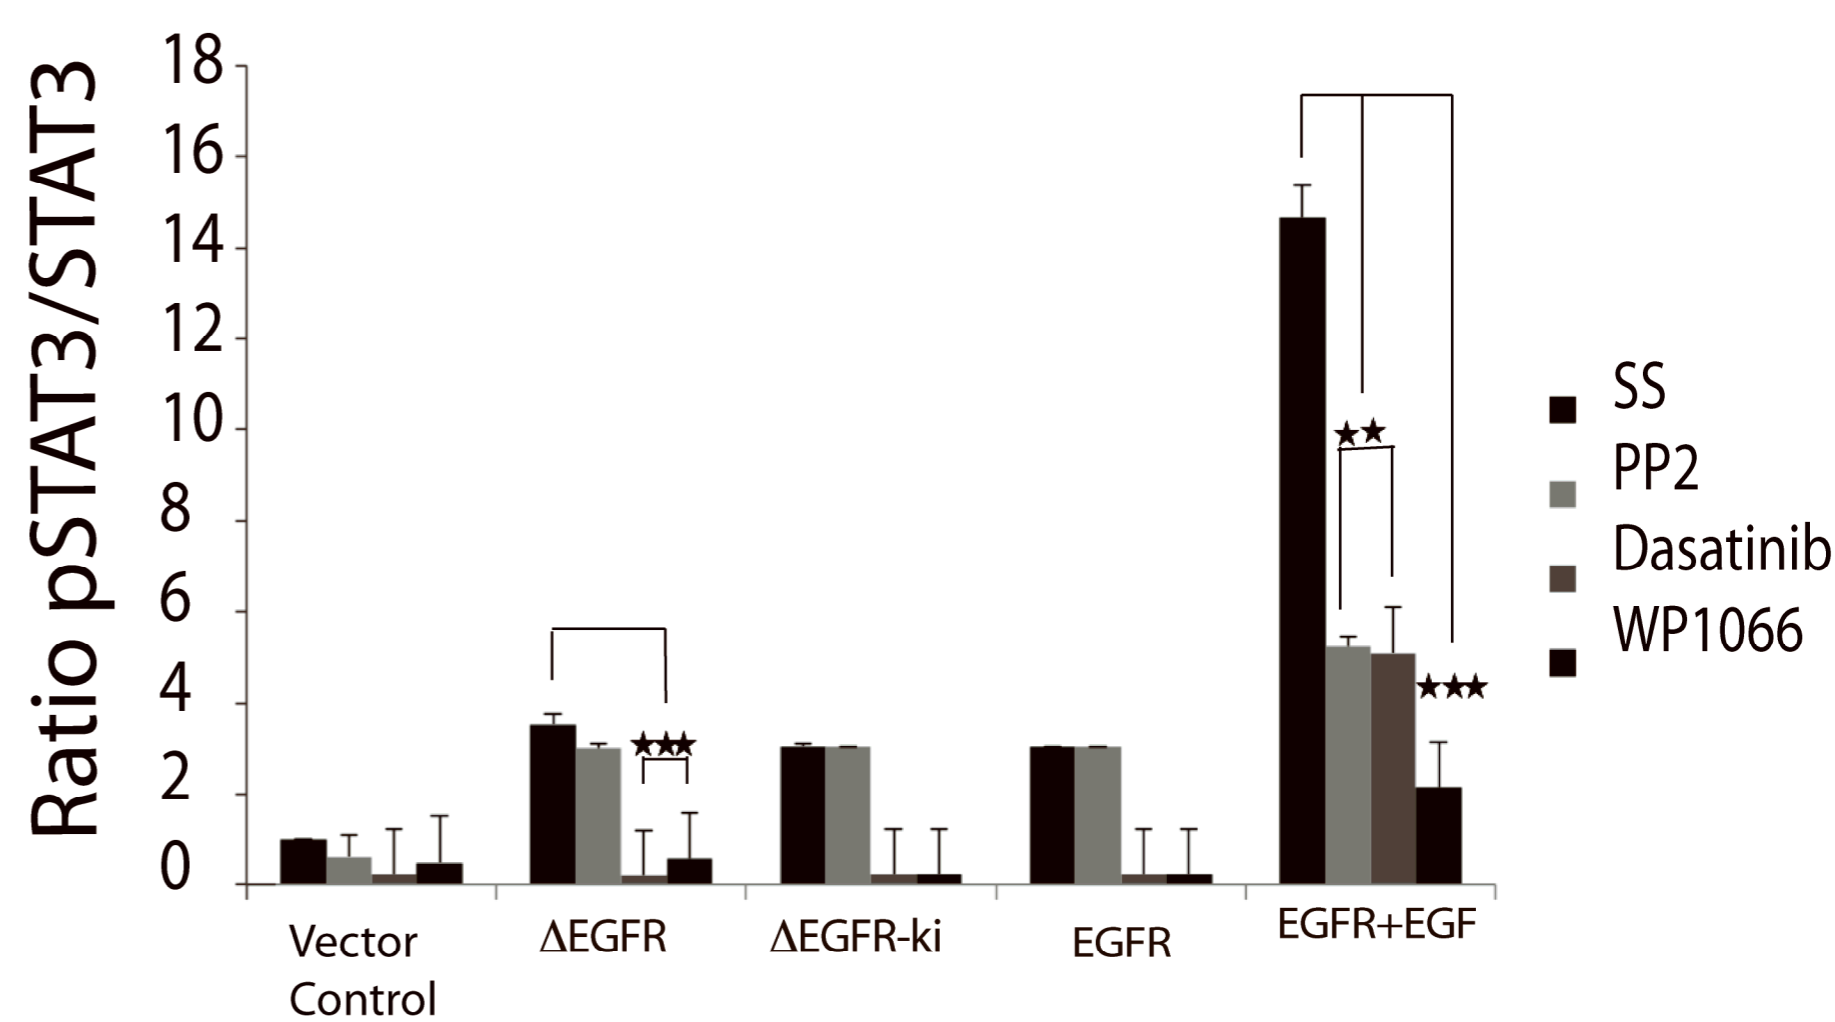

Type of file: figure

Label: Figure 4

Filename: IJC\_27690\_sm\_SuppFigS4.tif

# A

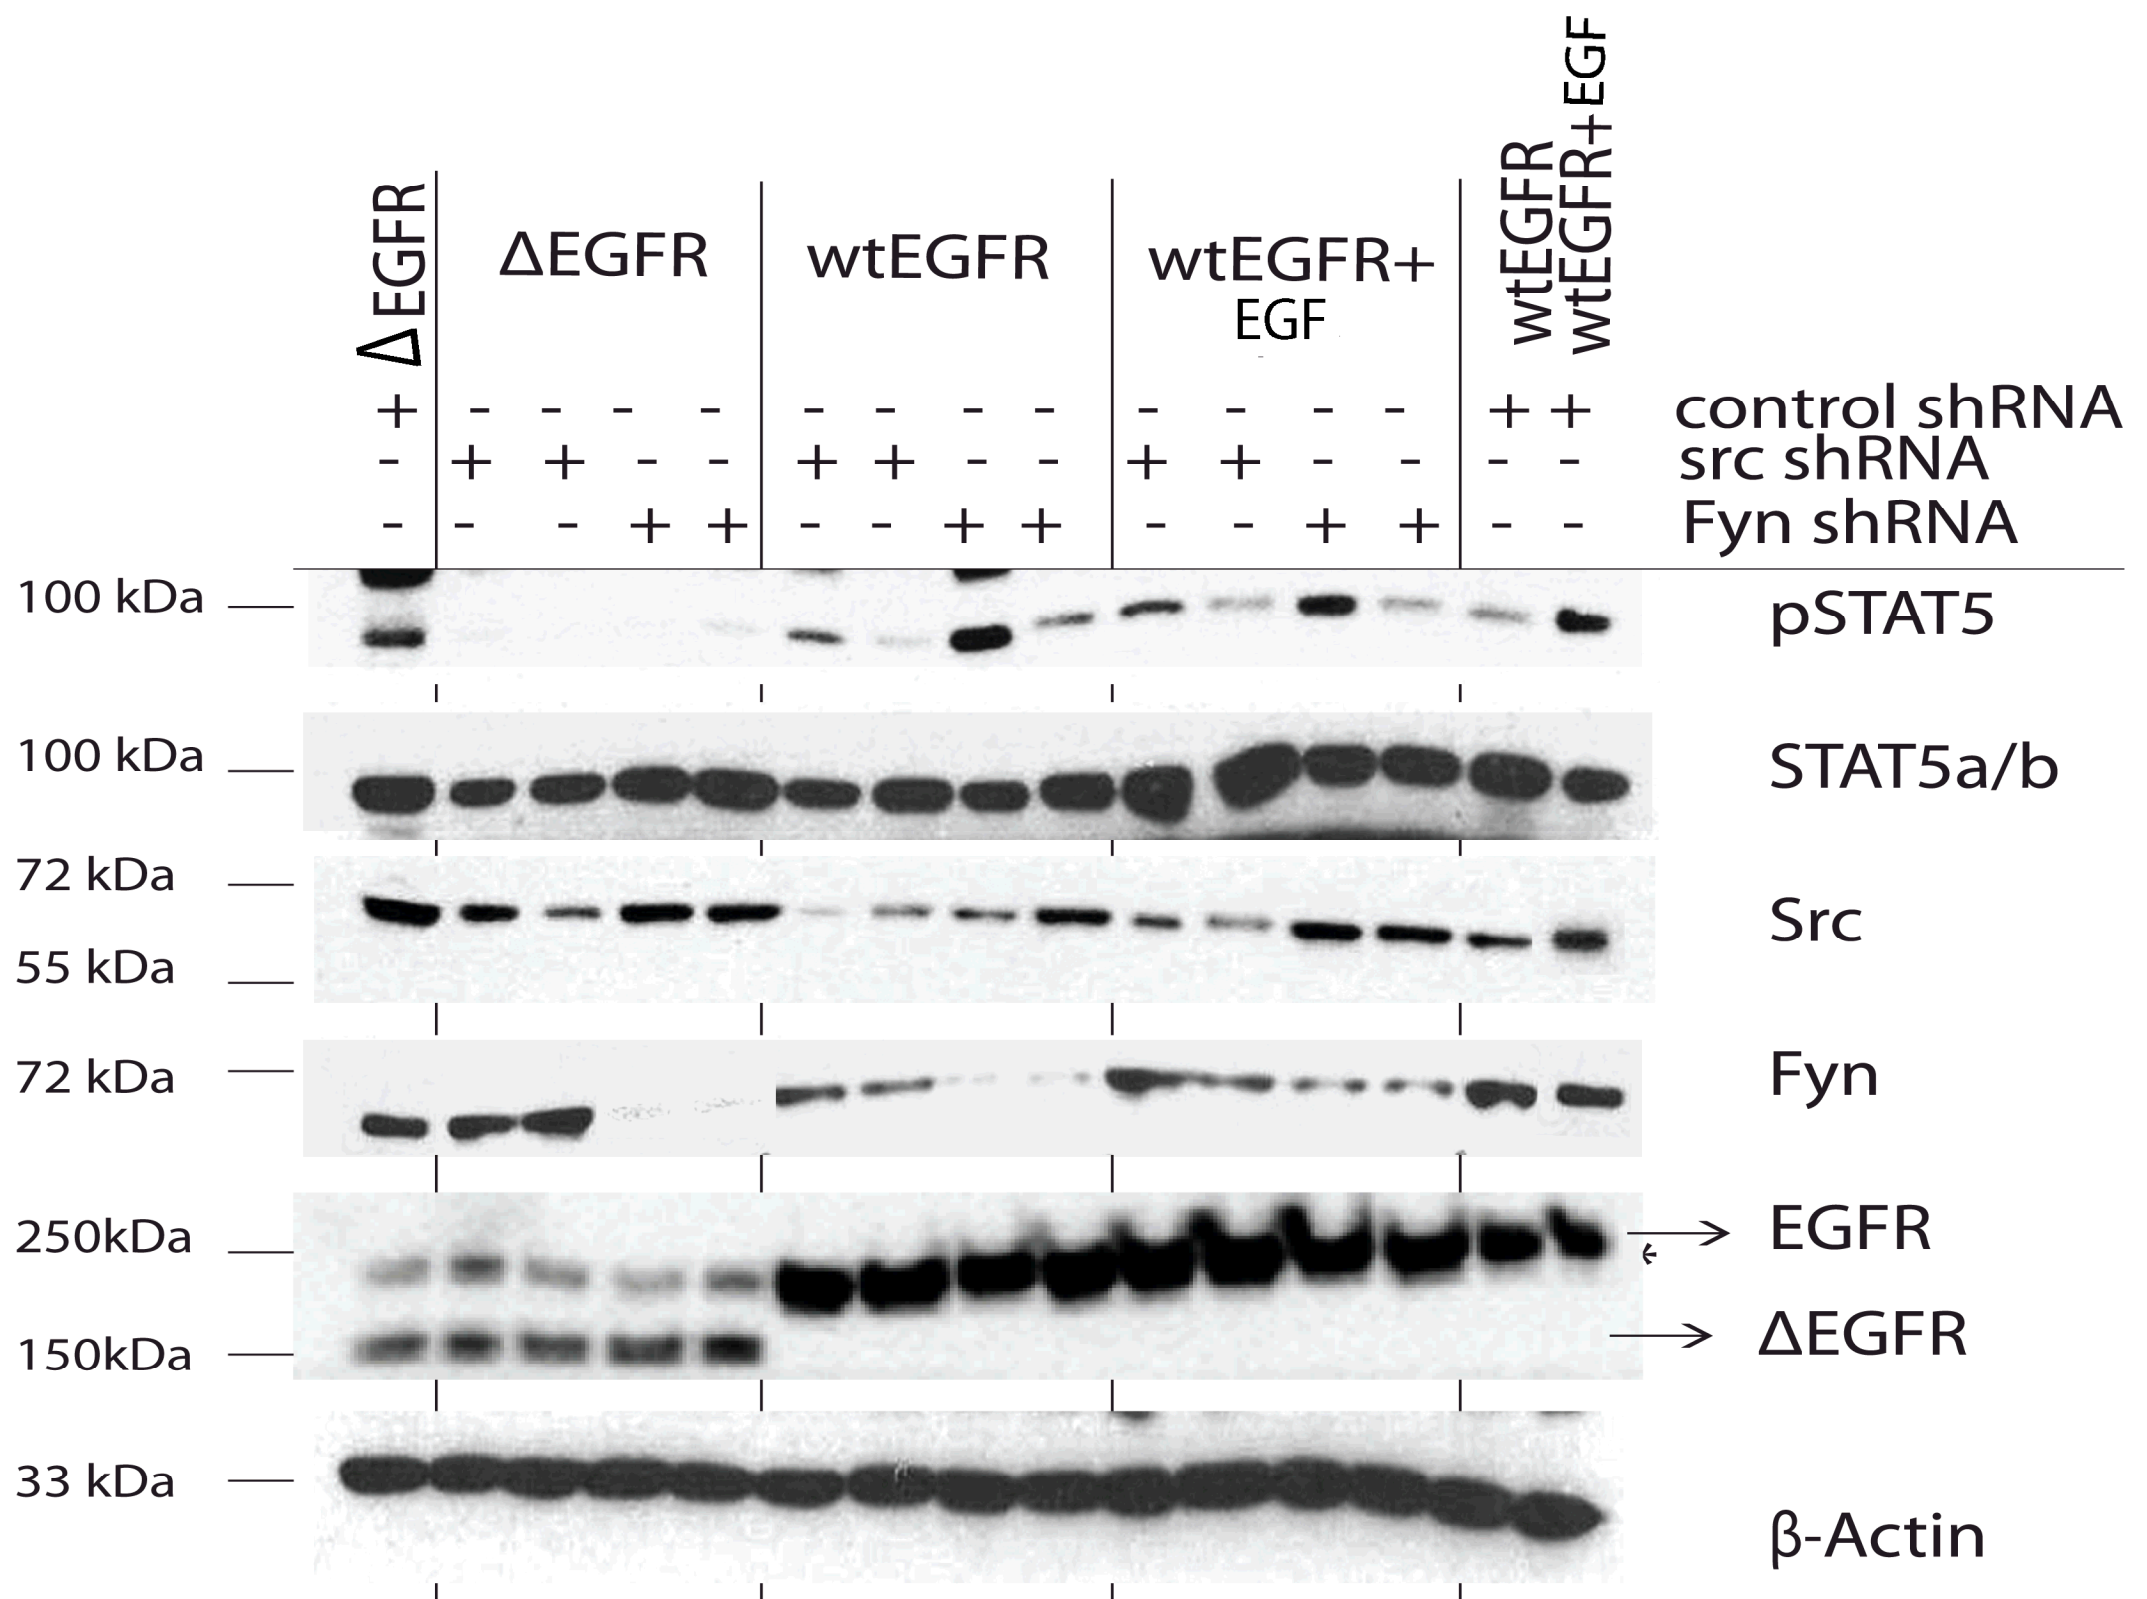

# B

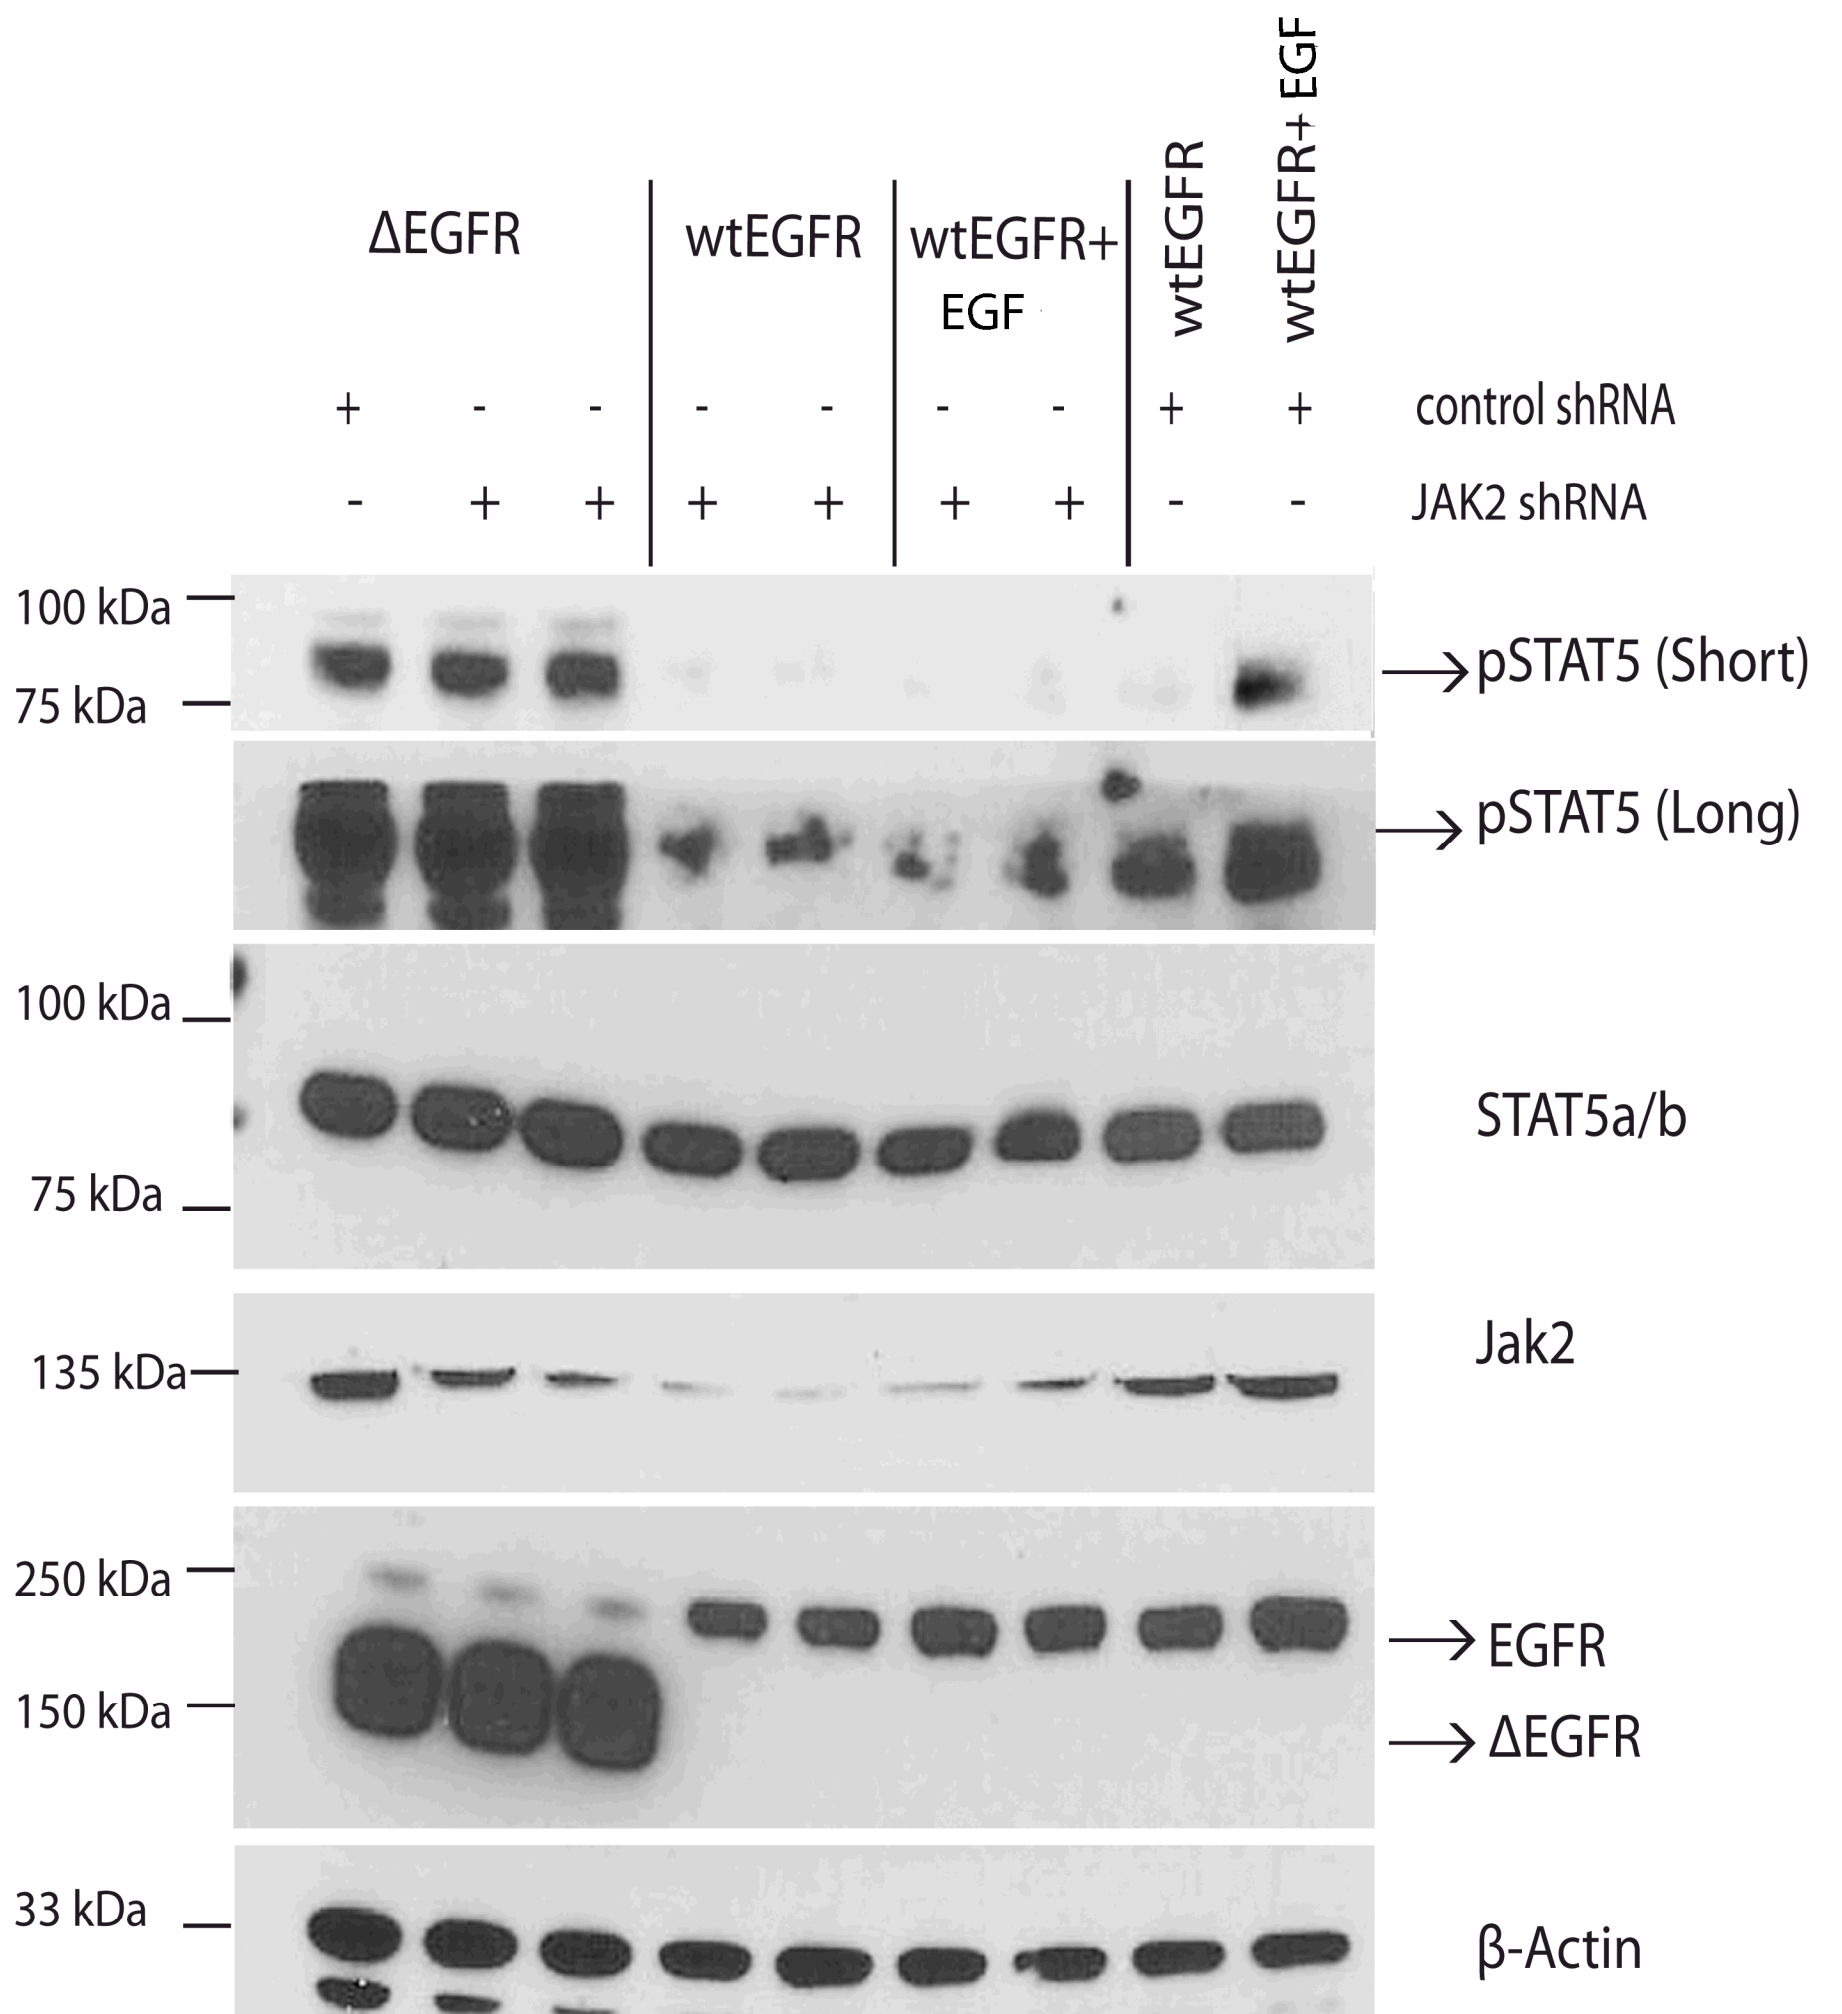



Type of file: figure

Label: Figure 5

Filename: IJC\_27690\_sm\_SuppFigS5.tif

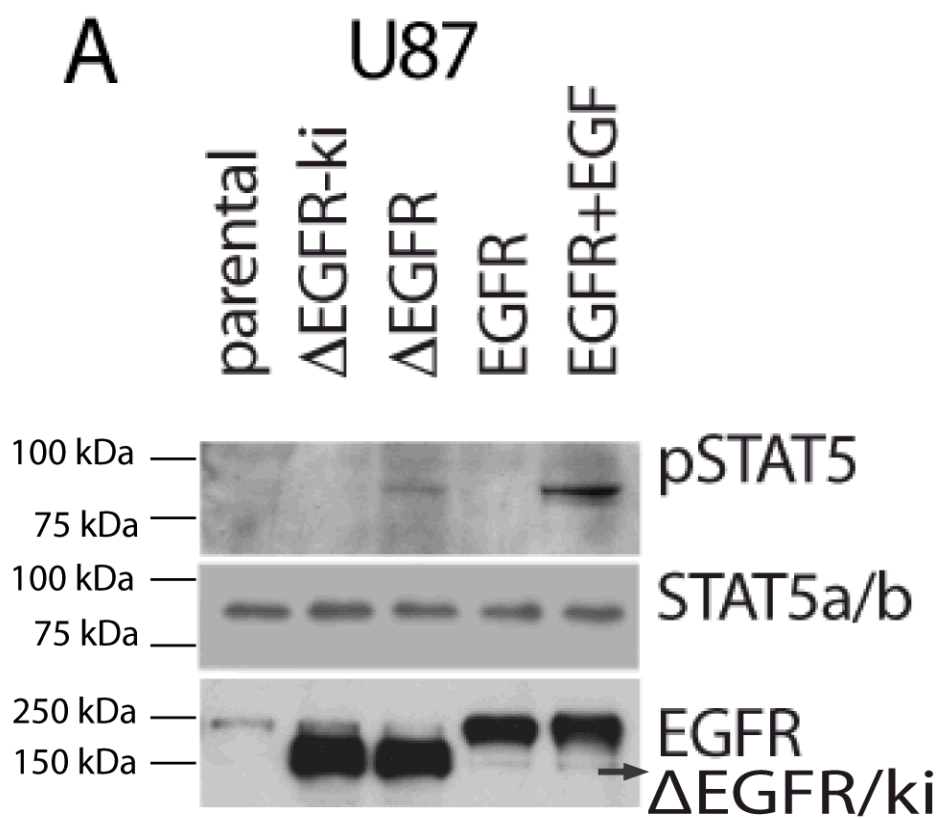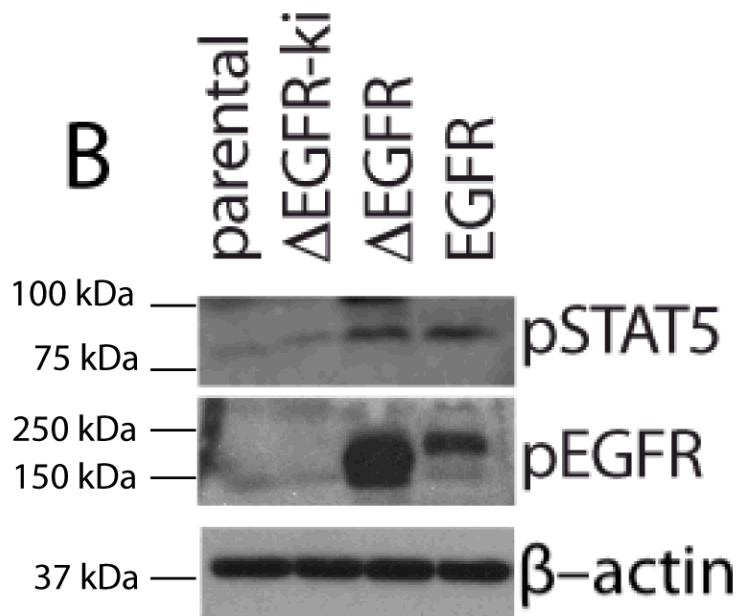

Type of file: figure

Label: Figure 6

Filename: IJC\_27690\_sm\_SuppFigS6.tif

**A**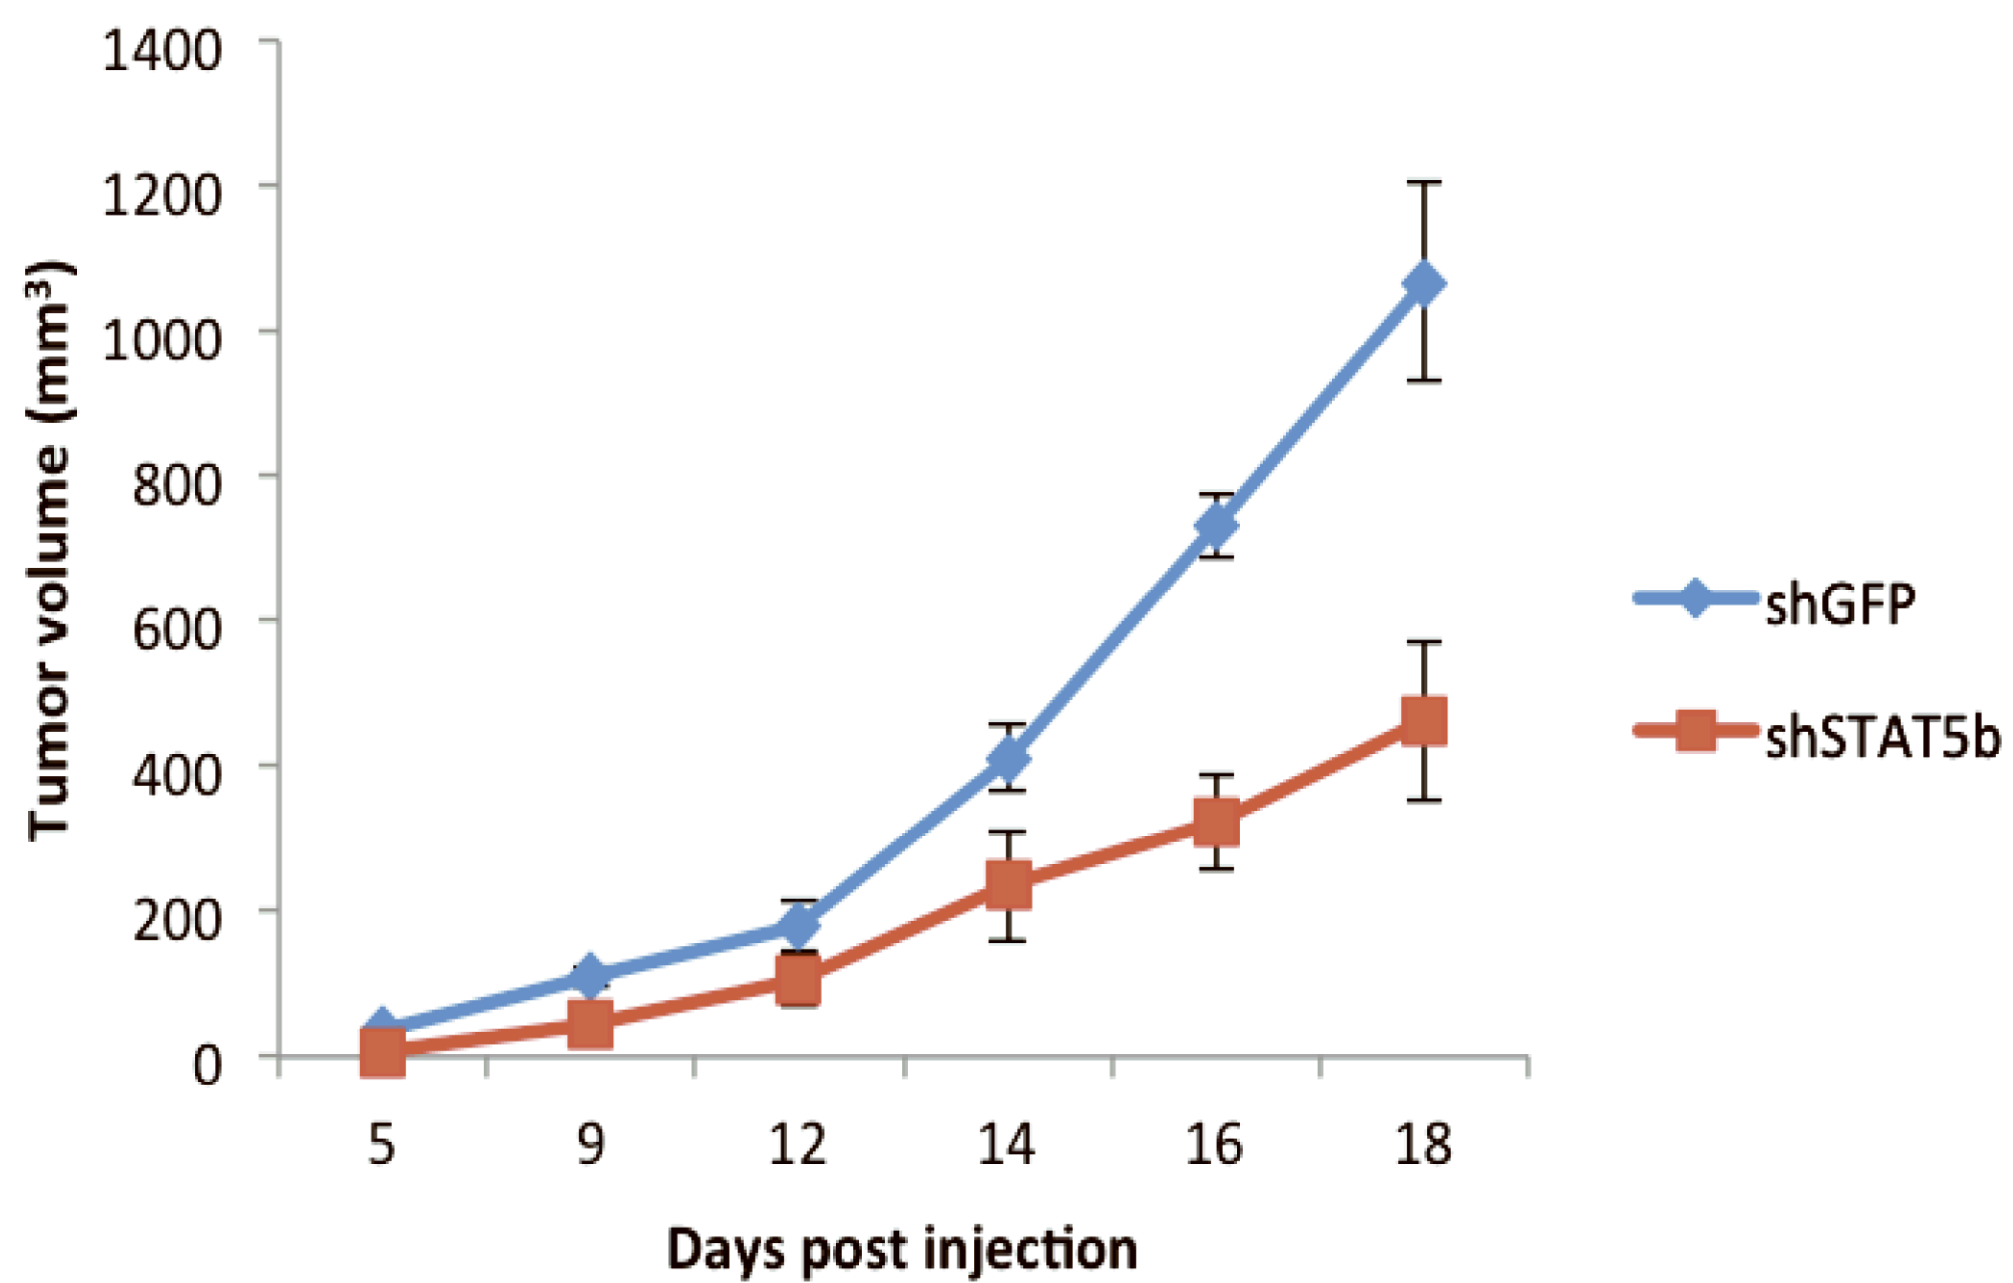**B**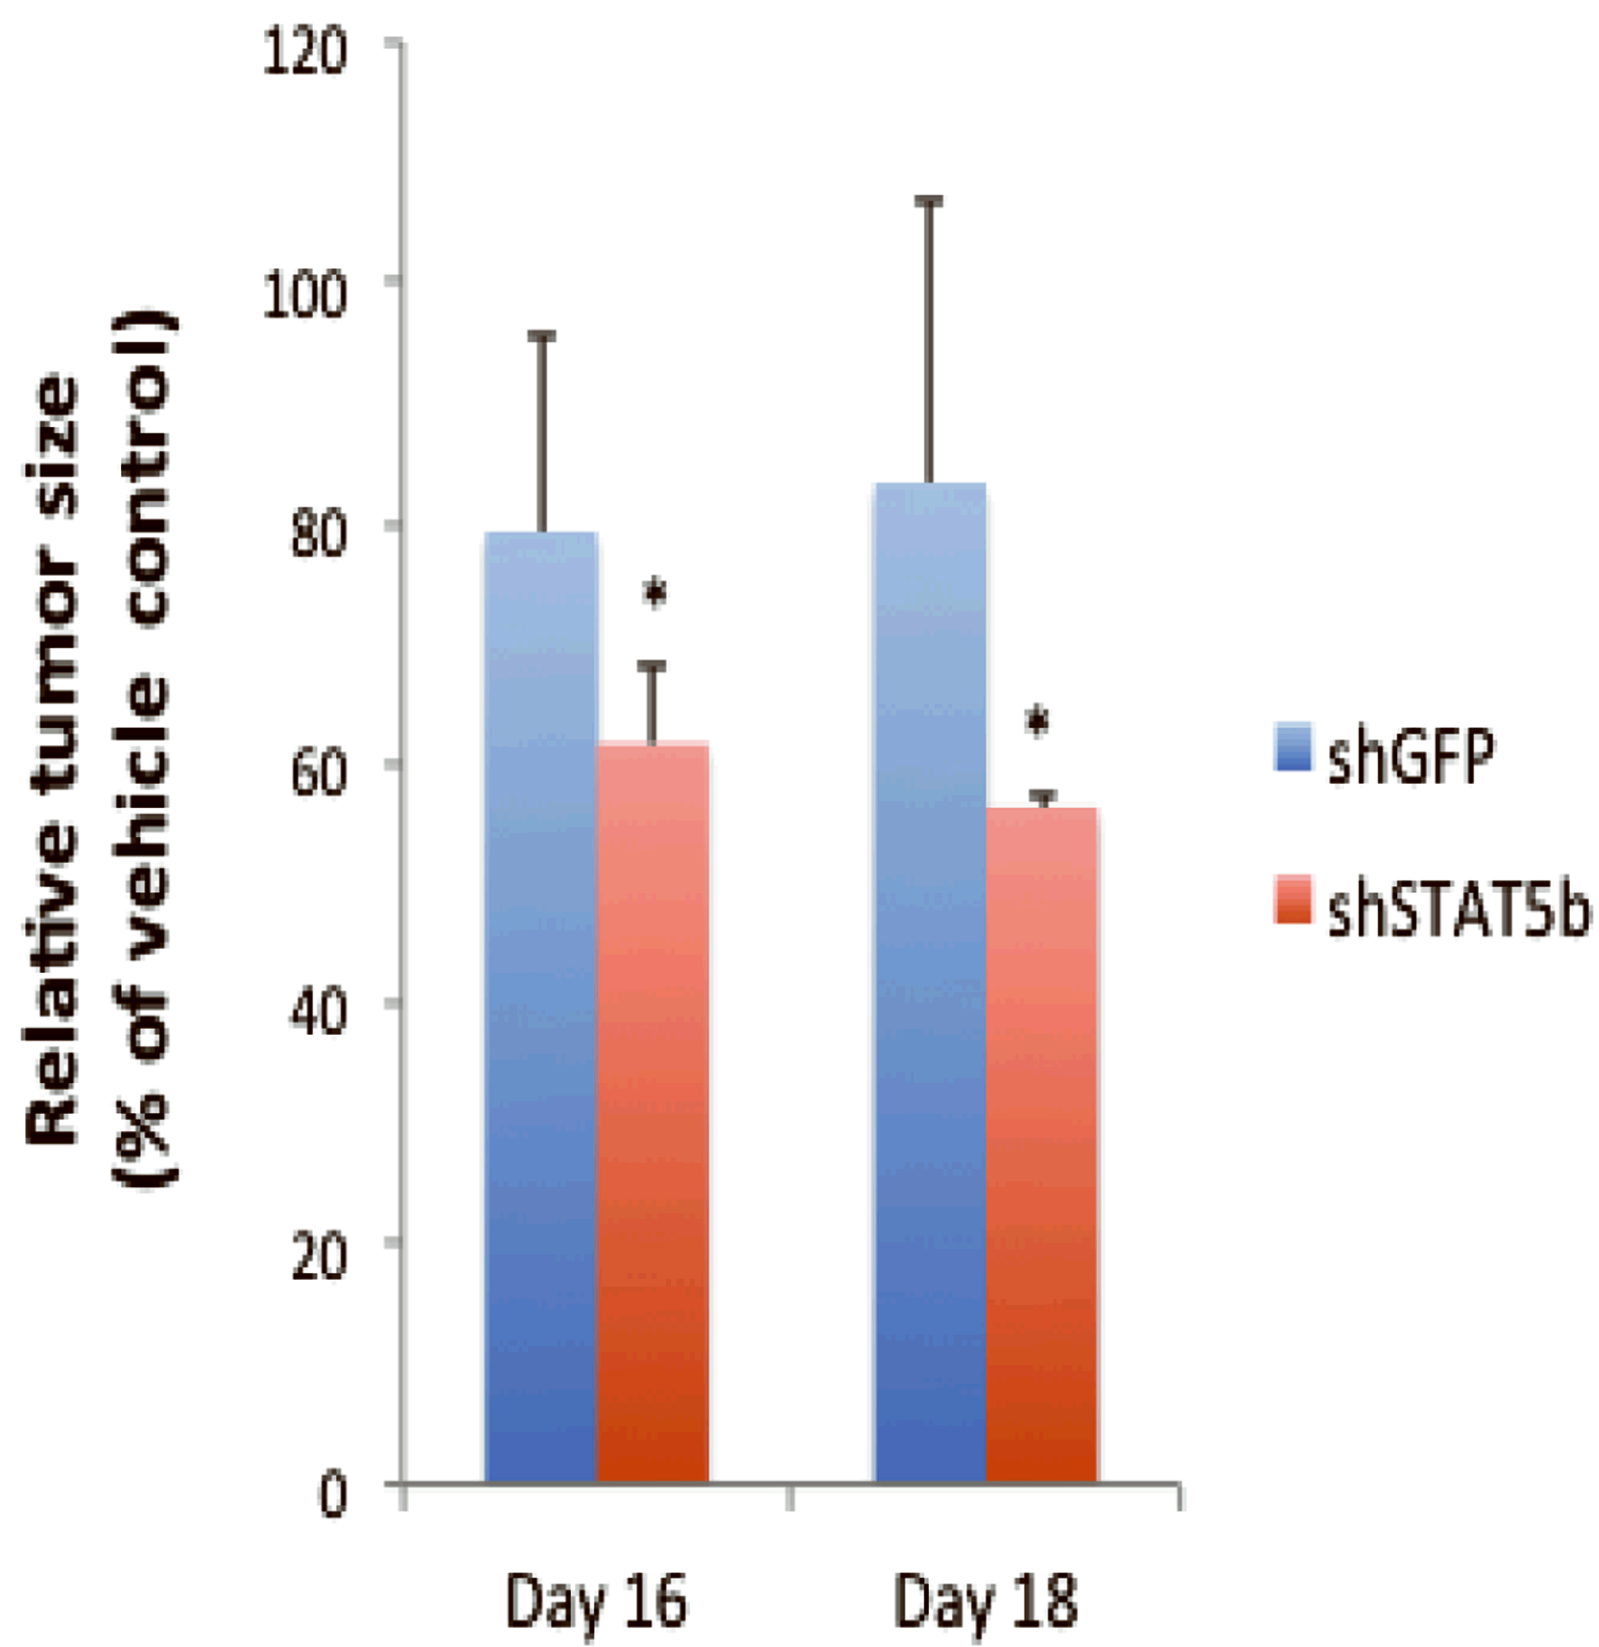

Type of file: table

Label: Table 7

Filename: IJC\_27690\_sm\_SuppTabS7.doc

| Column1 | U87    | Column2 | LNZ308 | Column3 | LN428  | Column4 |
|---------|--------|---------|--------|---------|--------|---------|
| Locus   | 1      | 2       | 1      | 2       | 1      | 2       |
| AMEL    | 105.95 | 0       | 106.07 | 0       | 110.9  | 105.8   |
| D31358  | 134.77 | 130.82  | 127.15 | 0       | 134.3  | 130.56  |
| TH01    | 177.59 | 0       | 177.8  | 0       | 179.44 | 172.38  |
| D13317  | 189.17 | 0       | 197.06 | 189.14  | 176.33 | 0       |
| D81179  | 217.94 | 213.86  | 225.88 | 205.6   | 224.77 | 220.73  |
| D7820   | 225.88 | 221.8   | 237.94 | 229.81  | 236.93 | 220.58  |
| TPOX    | 269.34 | 0       | 273.39 | 269.13  | 280.8  | 268.08  |
| D16539  | 295.55 | 0       | 295.4  | 282.52  | 281.31 | 0       |
| D1851   | 306.51 | 0       | 330.33 | 306.3   | 323.97 | 308.36  |
| CSF1PO  | 341.65 | 337.42  | 345.83 | 341.6   | 336.27 | 0       |
| Penta   |        |         |        |         |        |         |
|         | 433.1  | 408.7   | 418.6  | 408.79  | 428    | 0       |
| D       |        |         |        |         |        |         |
| Penta E | 433.64 | 396.51  | 412.74 | 396.73  | 444    | 433.36  |
